# Supplementary material for: Dietary pattern transitions, and the associations with BMI, waist circumference, weight and hypertension in a 7-year follow-up among the older Chinese population: a longitudinal study
Source: Springer Nature journal article supplement (doi:10.1186/s12889-016-3425-y), 2016-08-08

**Additional file 1.**

**Factor scores transition in 2004 and 2011 (N=1085)**

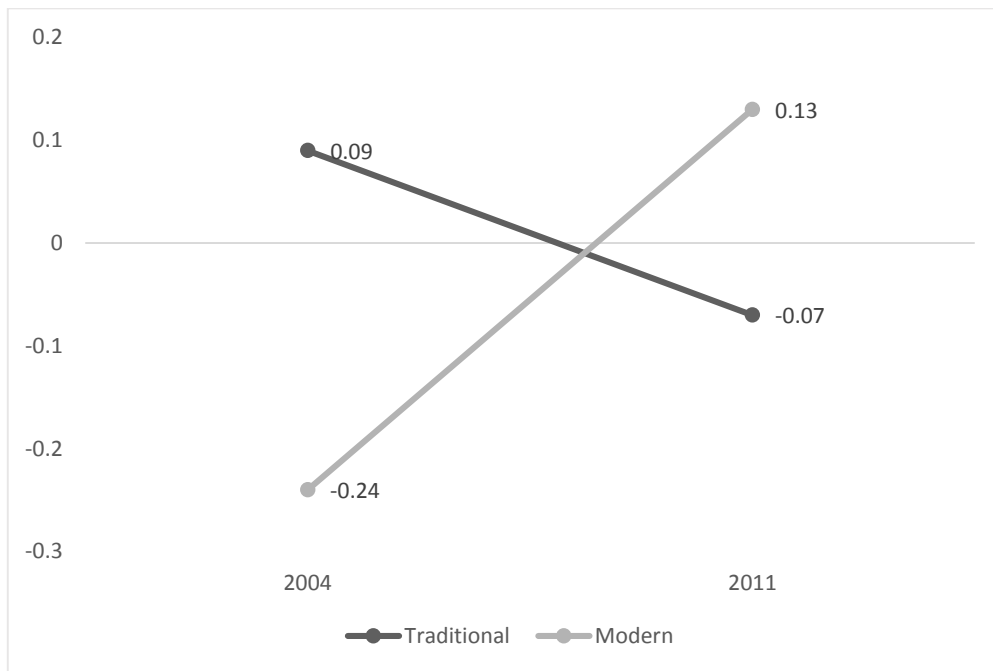

Supplement: MOESM1 [file 10565322]
