# Supplementary material for: Dietary pattern transitions, and the associations with BMI, waist circumference, weight and hypertension in a 7-year follow-up among the older Chinese population: a longitudinal study
Source: Springer Nature journal article supplement (doi:10.1186/s12889-016-3425-y), 2016-08-08
Supplement: MOESM2 [file 10565322]

Additional file 2.

The association between dietary pattern and BMI, Wt, WC and hypertension for participants in 2004 and 2011

|                                             | Quartiles of dietary pattern |       |              |       |              |       | P for trend  |              |
|---------------------------------------------|------------------------------|-------|--------------|-------|--------------|-------|--------------|--------------|
|                                             | Q1<br>Ref                    | OR    | Q2<br>95% CI | OR    | Q3<br>95% CI | OR    |              | Q4<br>95% CI |
| <b>BMI</b>                                  |                              |       |              |       |              |       |              |              |
| <i>Traditional</i><br>Adjusted <sup>a</sup> | 1                            | 0.04  | -0.31; 0.40  | -0.32 | -0.70; 0.07  | -0.65 | -1.06; 0.25  | <0.001       |
| <i>Modern</i><br>Adjusted <sup>b</sup>      | 1                            | 0.30  | -0.01; 0.61  | 0.65  | 0.33; 0.98   | 0.44  | 0.07; 0.81   | 0.005        |
| <b>Wt</b>                                   |                              |       |              |       |              |       |              |              |
| <i>Traditional</i><br>Adjusted <sup>a</sup> | 1                            | -0.82 | -1.72; 0.09  | -1.68 | -2.67; -0.69 | -2.55 | -3.60; -1.49 | <0.001       |
| <i>Modern</i><br>Adjusted <sup>b</sup>      | 1                            | 0.60  | -0.17; 1.36  | 1.70  | 0.88; 2.52   | 1.71  | 0.77; 2.64   | 0.02         |
| <b>WC</b>                                   |                              |       |              |       |              |       |              |              |
| <i>Traditional</i><br>Adjusted <sup>a</sup> | 1                            | -0.50 | -1.67; 0.66  | -1.04 | -2.26; 0.19  | -2.35 | -3.63; -1.07 | <0.001       |
| <i>Modern</i><br>Adjusted <sup>b</sup>      | 1                            | 0.55  | -0.50; 1.61  | 1.58  | 0.46; 2.71   | 1.79  | 0.54; 3.04   | <0.001       |
| <b>Hypertension</b>                         |                              |       |              |       |              |       |              |              |
| <i>Traditional</i><br>Adjusted <sup>c</sup> | 1                            | 1.11  | 0.85; 1.46   | 1.05  | 0.79; 1.38   | 1.16  | 0.86; 1.58   | 0.09         |
| Adjusted <sup>c</sup> + BMI                 | 1                            | 1.13  | 0.85; 1.49   | 1.15  | 0.86; 1.53   | 1.43  | 1.04; 1.96   | 0.002        |
| Adjusted <sup>c</sup> + WC                  | 1                            | 1.14  | 0.86; 1.50   | 1.13  | 0.85; 1.51   | 1.41  | 1.03; 1.92   | 0.003        |
| <i>Modern</i><br>Adjusted <sup>d</sup>      | 1                            | 1.13  | 0.87; 1.46   | 1.46  | 1.11; 1.92   | 1.07  | 0.79; 1.45   | 0.29         |
| Adjusted <sup>d</sup> + BMI                 | 1                            | 1.07  | 0.82; 1.39   | 1.31  | 0.99; 1.73   | 0.98  | 0.72; 1.33   | 0.67         |
| Adjusted <sup>d</sup> + WC                  | 1                            | 1.11  | 0.85; 1.44   | 1.33  | 1.00; 1.75   | 0.98  | 0.72; 1.33   | 0.64         |

Adjusted<sup>a</sup> model was adjusted for age, urbanization, gender, marital status, work status, education level, smoking, physical activity, modern dietary pattern, energy, and other NCDs; Adjusted<sup>b</sup> model was adjusted for age, urbanization, gender, marital status, work status, education level, smoking, physical activity, traditional dietary pattern, energy, and other NCDs. Adjusted<sup>c</sup> model was adjusted for age, urbanization, gender, marital status, work status, education level, smoking, physical activity, modern dietary pattern, energy, salt, lead, and other NCDs; Adjusted<sup>d</sup> model was adjusted for age, urbanization, gender, marital status, work status, education level, smoking, physical activity, traditional dietary pattern, energy, salt and other NCDs.
