# Supplementary material for: Dietary pattern transitions, and the associations with BMI, waist circumference, weight and hypertension in a 7-year follow-up among the older Chinese population: a longitudinal study
Source: Springer Nature journal article supplement (doi:10.1186/s12889-016-3425-y), 2016-08-08
Supplement: MOESM3 [file 10565322]

### Additional file 3.

#### Marginal mean of dietary patterns at baseline by three groups (N=2197)

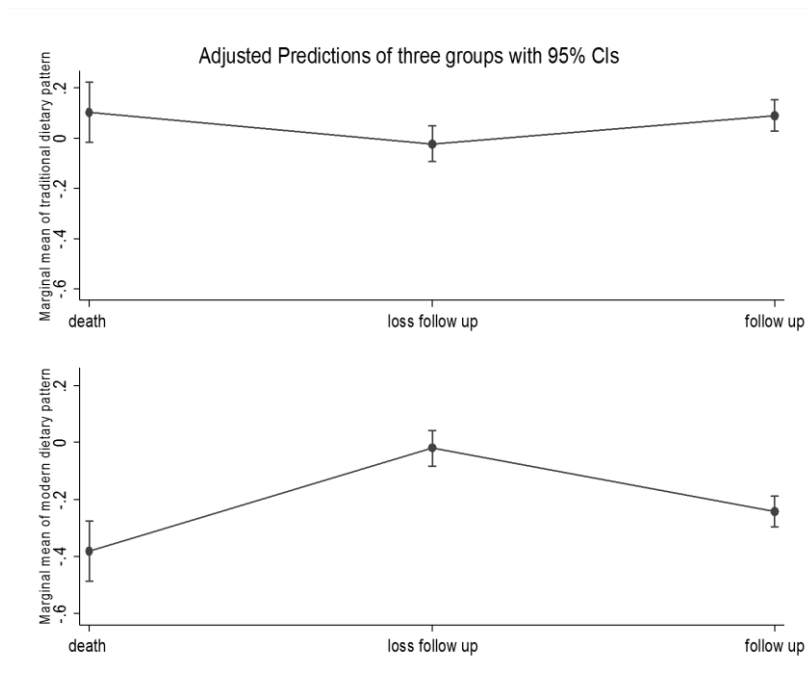

\* *Death: N=289; Lost to follow-up: N=823; and follow-up participants: N=1085.*
